# Supplementary material for: A melanosomal two-pore sodium channel regulates pigmentation
Source: PubMed Central journal article supplement (PMC4882593; doi:10.1038/srep26570), 2016-05-27
Supplement: srep26570-s1.pdf [file srep26570-s1.pdf]

# **A melanosomal two-pore sodium channel regulates pigmentation.**

Nicholas W. Bellono<sup>#1,2</sup>, Iliana E. Escobar<sup>#1</sup>, Elena Oancea<sup>1\*</sup>

## **Supplementary Information**

## Supplementary Figures

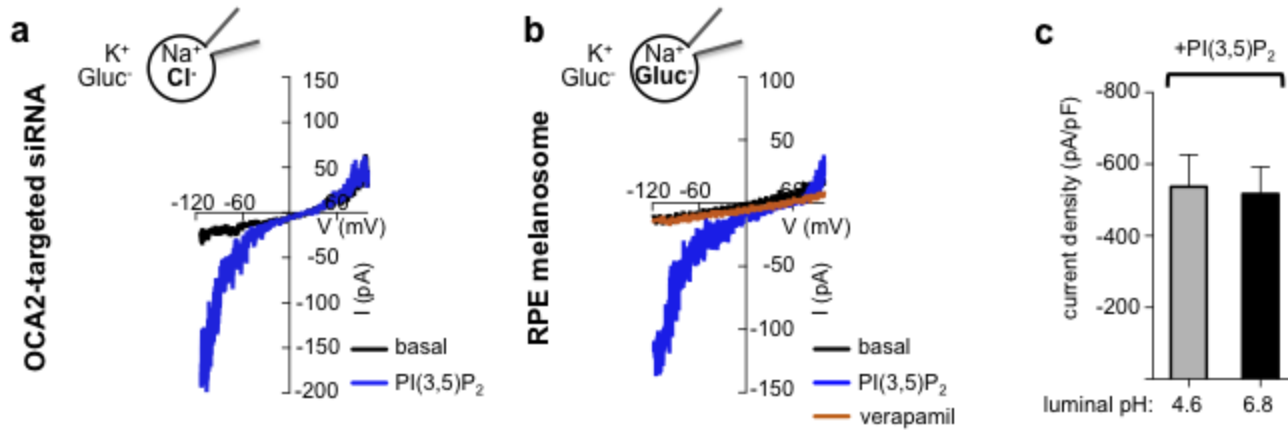

### Supplementary Figure 1. $I_{PIP_2}$ properties.

- $PI(3,5)P_2$  activates inwardly rectifying  $I_{PIP_2}$  in the absence of OCA2-mediated  $Cl^-$  currents (representative of  $n = 2$  melanosomes). OCA2 expression was reduced in  $Oa1^{-/-}$  melanocytes, with OCA2-targeted siRNA<sup>1</sup>.
- In a RPE melanosome,  $I_{PIP_2}$  is inhibited by 150  $\mu M$  verapamil, similar to dermal melanosome  $I_{PIP_2}$  (representative of  $n = 2$  melanosomes).
- $I_{PIP_2}$  current density (pA/pF) measured from  $Oa1^{-/-}$  melanosomes was similar when the luminal (pipette) pH was 4.6 or 6.8. Average current density (pA/pF) measured at -120 mV ( $\pm$  s.e.m.,  $n = 4$  melanosomes).

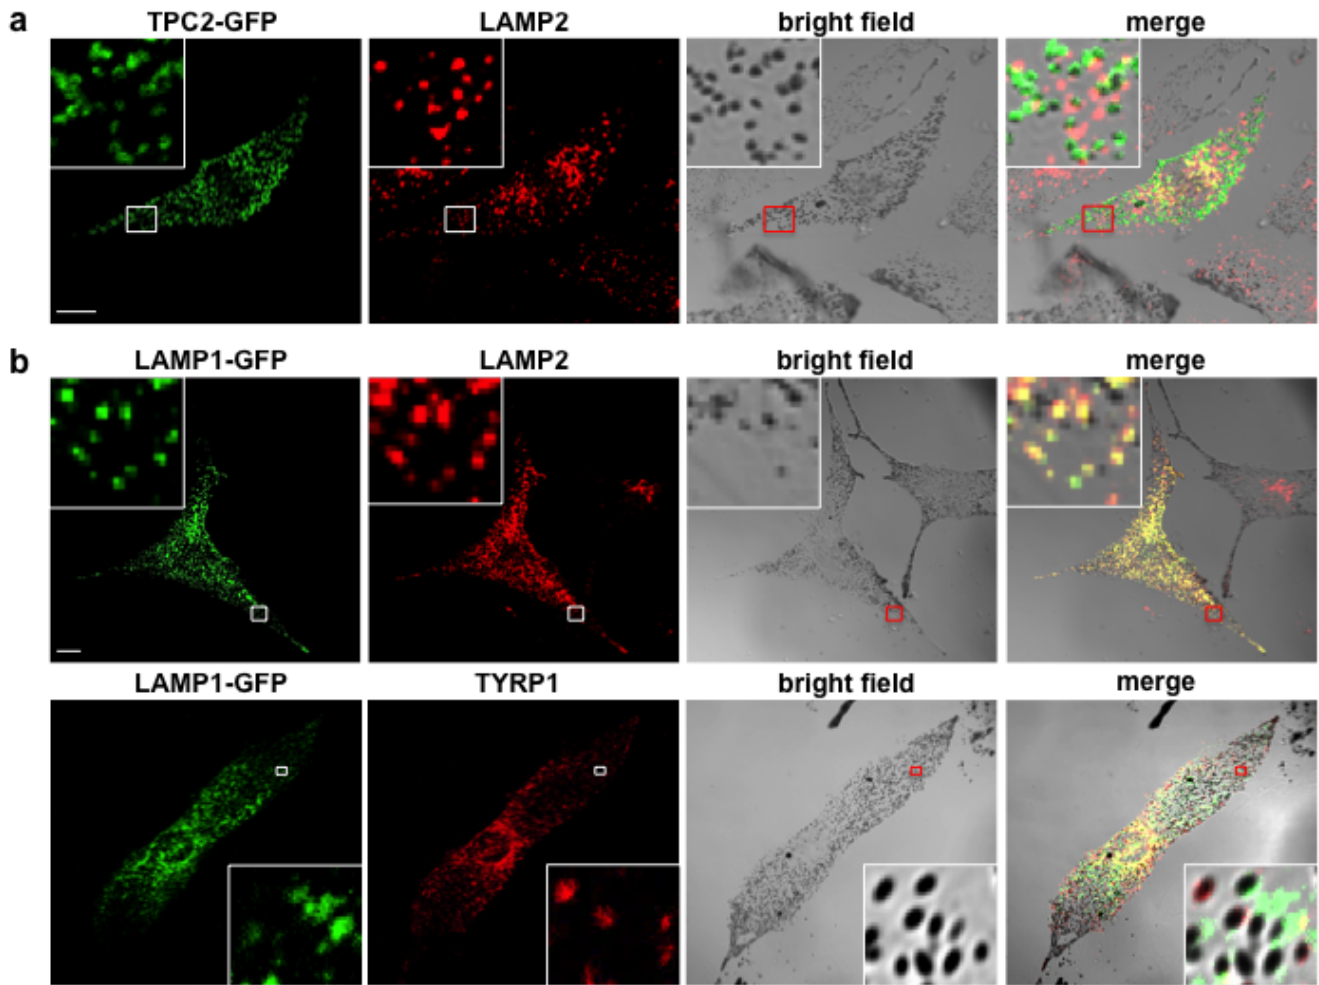

**Supplementary Figure 2. TPC2 does not exhibit significant lysosomal localization in pigment cells.**

**a)** In melan-a melanocytes GFP-tagged TPC2 (green) localizes to melanin ( $50.9 \pm 3.2\%$ ) (bright field) and TYRP1 (red)-positive compartments, but does not significantly overlap with structures immunolabeled with antibodies against the lysosomal marker LAMP2 (red) ( $7.0 \pm 2.7\%$ ,  $p < 0.0001$ ). Enlarged images of outlined regions shown in lower panels. Scale bar = 10  $\mu\text{m}$ .

**b)** Expression of the lysosomal protein LAMP1 tagged with GFP (green) localizes to LAMP2 (red)-positive compartments in melan-a cells ( $71.4 \pm 6.2\%$ ). LAMP1-GFP (green) does not localize to melanin (bright field) and TYRP1 (red)-positive compartments LAMP1 ( $12.1 \pm 2.1\%$ ,  $p < 0.0001$ ).

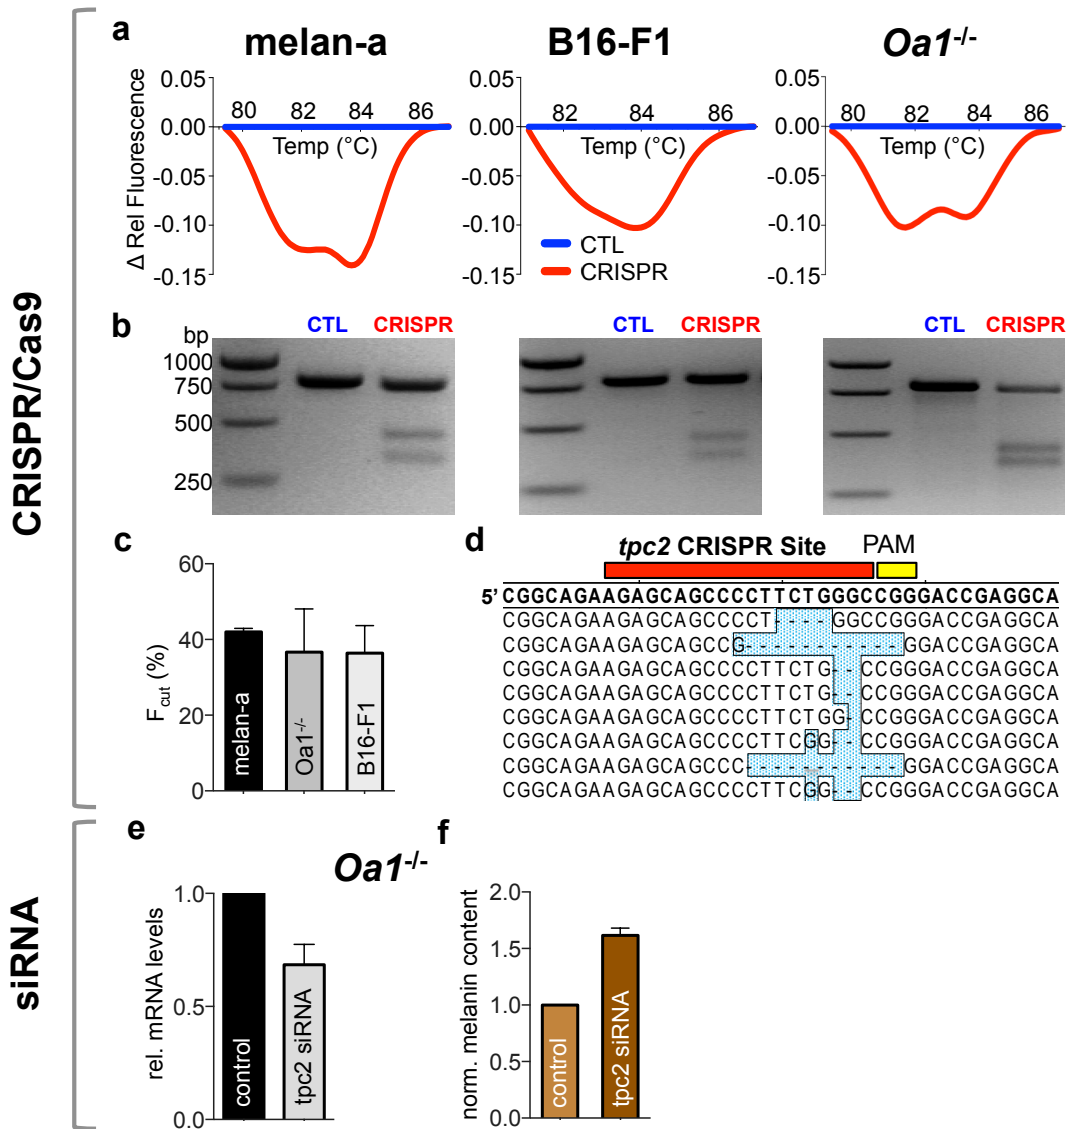

**Supplementary Figure 3. Efficiency of *tpc2*-targeted CRISPR-Cas9 and siRNA in melanocytes.**

- a)** High resolution melt analysis of genomic DNA (gDNA) obtained from control (blue) melan-a, B16-F1, or *Oa1<sup>-/-</sup>* melanocytes and *tpc2*-targeted CRISPR-Cas9 (red) populations of the same types of cells. Differences in the relative fluorescence intensity ( $\Delta$  Rel Fluorescence) between the control and CRISPR-Cas9 treated cells are due to gDNA mutations in the targeted sequence.

- b)** Representative gels from mutation detection assay using gDNA from melan-a, B16-F1, or *Oa1*<sup>-/-</sup> melanocytes expressing control or *tpc2*-targeted CRISPR-Cas9. Cleaved DNA fragments are due to indels caused by CRISPR-Cas9-induced mutations.
- c)** Average fraction of cleaved fragments ( $F_{\text{cut}}$ ) from Guide-it Resolvase assay determined from  $n = 3$  independent experiments.
- d)** Identification of individual mutations in melanocytes treated with *tpc2*-targeted CRISPR-Cas9 using single gDNA species cloned in the TOPO vector. The sequences from each clone were aligned with the wild-type sequence (in bold) revealing a range of deletions and insertions the *tpc2* gene (highlighted in blue) at the CRISPR site.
- e)** Mouse *tpc2*-targeted siRNA stably expressed in *Oa1*<sup>-/-</sup> melanocytes reduced the TPC2 mRNA levels by ~30%, compared to control siRNA. ( $\pm$  s.e.m.,  $n = 3$ ,  $p < 0.01$ )
- f)** Melanocytes expressing TPC2-targeted siRNA have ~50% higher melanin content than control siRNA expressing cells. ( $\pm$  s.e.m.,  $n = 3$ ,  $p < 0.001$ )

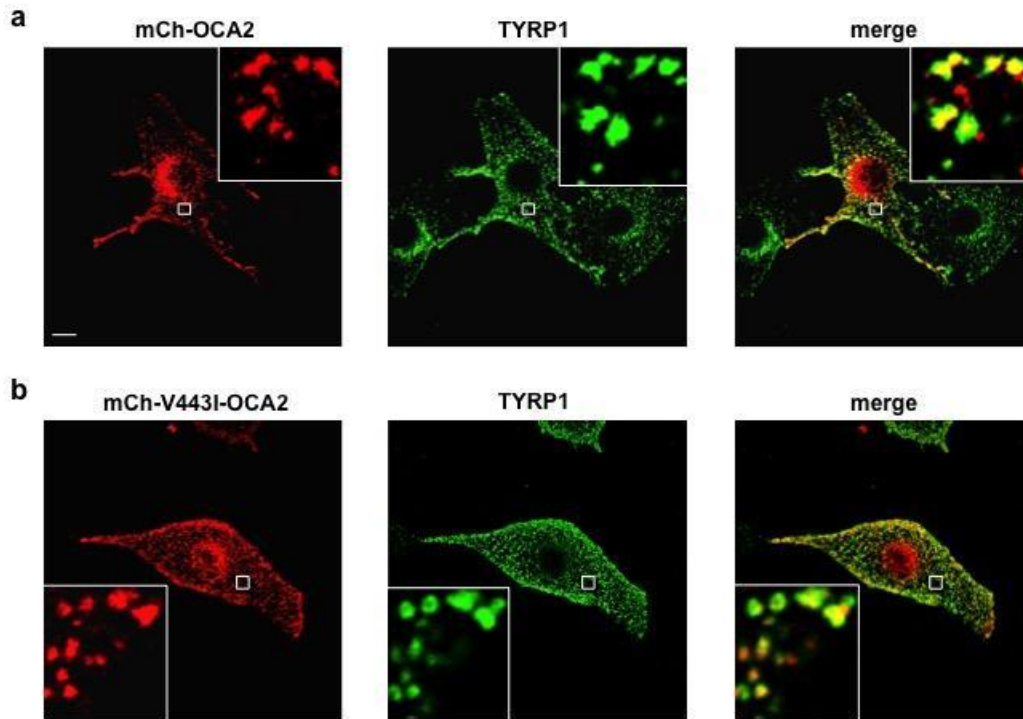

**Supplementary Figure 4. WT and V443I OCA2 variants localize to melanosomes in B16-F1 melanocytes.**

- a) In B16-F1 melanocytes mCherry-tagged wild type (WT) OCA2 (red) localizes to TYRP1 immunostained (green) compartments. Enlarged images of outlined regions shown in lower panels. Scale bar = 10  $\mu$ m.
- b) mCherry-tagged V443I mutant OCA2 (red) localizes to TYRP1 immunostained (green) compartments in B16-F1 cells.

## Supplementary reference

- 1 Bellono, N. W., Escobar, I. E., Lefkovith, A. J., Marks, M. S. & Oancea, E. An intracellular anion channel critical for pigmentation. *eLife* **3** (2014).
